# Supplementary material for: Occupational and leisure time physical activity: risk of all-cause mortality and myocardial infarction in the Copenhagen City Heart Study. A prospective cohort study
Source: PubMed Central journal article supplement — BMJ Open. 2012 Feb 13;2(1):e000556. doi: 10.1136/bmjopen-2011-000556 (PMC3282285; doi:10.1136/bmjopen-2011-000556), 2012-02-13
Supplement: bmjopen-2011-000556.draft_revisions.pdf [file bmjopen-2011-000556.draft_revisions.pdf]

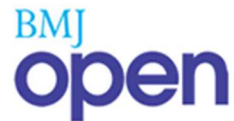

**Occupational and leisure time physical activity: risk of all-cause mortality and myocardial infarction in the Copenhagen City Heart Study**

|                                 |                                                                                                                                                                                                                                                                   |
|---------------------------------|-------------------------------------------------------------------------------------------------------------------------------------------------------------------------------------------------------------------------------------------------------------------|
| Journal:                        | <i>BMJ Open</i>                                                                                                                                                                                                                                                   |
| Manuscript ID:                  | bmjopen-2011-000556                                                                                                                                                                                                                                               |
| Article Type:                   | Research                                                                                                                                                                                                                                                          |
| Date Submitted by the Author:   | 27-Oct-2011                                                                                                                                                                                                                                                       |
| Complete List of Authors:       | Holtermann, Andreas<br>Marott, Jacob<br>Gyntelberg, Finn<br>Søgaard, Karen<br>Suadicani, Poul<br>Mortensen, Ole; Bispebjerg University Hospital, Department of Occupational Health<br>prescott, eva; Bispebjerg University Hospital, Cardiology<br>Schnohr, Peter |
| <b>Primary Subject Heading</b>: | Occupational & environmental medicine                                                                                                                                                                                                                             |
| Secondary Subject Heading:      | Epidemiology, Public health                                                                                                                                                                                                                                       |
| Keywords:                       | OCCUPATIONAL & INDUSTRIAL MEDICINE, Myocardial infarction < CARDIOLOGY, PUBLIC HEALTH                                                                                                                                                                             |
|                                 |                                                                                                                                                                                                                                                                   |

SCHOLARONE™  
Manuscripts

only

1  
2  
3  
4 **Occupational and leisure time physical activity:**  
5  
6 **risk of all-cause mortality and myocardial infarction in the Copenhagen City Heart Study**  
7

8 Andreas Holtermann<sup>1</sup>, Jacob Louis Marott<sup>2</sup>, Finn Gyntelberg<sup>3</sup>, Karen Søgaard<sup>4</sup>, Poul Suadicani<sup>3</sup>, Ole Steen Mortensen<sup>1,3</sup>,  
9 Eva Prescott<sup>2,5</sup>, Peter Schnohr<sup>2</sup>  
10  
11

12 <sup>1</sup>National Research Centre for the Working Environment, Lersø Park Allé 105, DK-2100, Copenhagen, Denmark  
13

14 <sup>2</sup>The Copenhagen City Heart Study, Bispebjerg University Hospital, Bispebjerg Bakke 23, DK-2400 Copenhagen, Denmark  
15

16 <sup>3</sup>The Copenhagen Male Study, Epidemiological Research Unit, Dept. of Occupational and Environmental Medicine, Bispebjerg University  
17 Hospital, DK-2400 Copenhagen NV, Denmark  
18

19 <sup>4</sup>Institute of Sport Science and Clinical Biomechanics, University of Southern Denmark, Campusvej 55, DK-5230 Odense M, Denmark  
20

21 <sup>5</sup>Department of Cardiology, Bispebjerg University Hospital, Bispebjerg Bakke 23, DK-2400 Copenhagen, Denmark  
22  
23  
24  
25  
26

27 Corresponding Author

28 Andreas Holtermann,

29 National Research Centre for the Working Environment,

30 Copenhagen, Denmark  
31

32 E-mail: [aho@nrcwe.dk](mailto:aho@nrcwe.dk)  
33

34 Telephone number: 0045 39165200  
35  
36  
37

38  
39 Keywords: Cardiovascular disease; occupational health; physical work demands; physical exercise  
40

41 Word count: 3000  
42  
43  
44  
45

## ABSTRACT

**Objectives** Men with low physical fitness and high occupational physical activity are recently shown to have an increased risk of cardiovascular disease and all-cause mortality. The association between occupational physical activity with cardiovascular disease and all-cause mortality may also depend on leisure time physical activity.

**Design** 7,819 males and females aged 25-66 years without history of cardiovascular disease who attended an initial examination in the Copenhagen City Heart Study in 1976-78 were followed for myocardial infarction and all-cause mortality until 2010. Occupational physical activity was defined by combining information from baseline (1976-78) with re-assessment in (1981-83). Conventional risk factors were controlled for in Cox analyses.

**Results** During the follow-up, 2,888 subjects died from all-cause mortality and 787 had a first event of myocardial infarction. Overall, occupational physical activity predicted all-cause mortality and myocardial infarction in men, but not in women (test for interaction  $p=0.02$ ). Among males, high occupational physical activity was associated with an increased risk of all-cause mortality among those with low and moderate leisure time physical activity (Hazard ratio (HR) =1.56; 95% confidence interval (95%CI) 1.11-2.18) and (HR=1.31; 95%CI 1.05-1.63), but not among males with high leisure time physical activity (HR=1.00; 95%CI 0.78-1.26) (test for interaction  $p=0.04$ ). Similar, but weaker tendencies were found for myocardial infarction. Among women, OPA was not associated with subsequent all-cause mortality or MI.

**Conclusions** The findings suggest that high leisure time physical activity perhaps through increased physical fitness yields protection against harmful effects of high occupational physical activity among men.

## ARTICLE SUMMARY

### Article focus

- Men with low physical fitness and high occupational physical activity are recently shown to have an increased risk of cardiovascular disease and all-cause mortality.
- It is unknown if the association between occupational physical activity with cardiovascular disease and all-cause mortality also depends on leisure time physical activity.

### Key messages

- This study shows that men with high occupational physical activity have an increased risk of all-cause mortality.
- Leisure time physical activity was found to modify the positive association between occupational physical activity and risk of all-cause mortality
- Men with high occupational physical activity ought to be recommended and given the possibility to be highly physically active during leisure time

### Strengths and limitations

Study strengths include the long follow-up time, repeated assessment of the occupational physical activity, objective measures of several covariates from clinical examinations, and information on outcomes obtained from valid registers, and participation of both genders. Some limitations are the lack of control for psychosocial work factors and the self-assessed exposures.

## INTRODUCTION

A positive association has been demonstrated between occupational physical activity and risk of cardiovascular and all-cause mortality among men with low cardiorespiratory capacity, i.e. physical fitness [1]. A physiological explanation may be prolonged intravascular turbulence and increased wall shear stress from occupational physical activity several hours per day [2], inducing inflammatory processes in the arterial walls eventually leading to atherosclerosis [3].

Theoretically, these acute adverse effects of occupational physical activity may be modified by leisure time physical activity known to promote cardio-respiratory fitness [4] and reduce heart rate and blood pressure during daily activities [5]. A higher cardio-respiratory fitness and lower heart rate provides a longer period in the diastolic phase of the cardiac cycle, causing better myocardium perfusion and reduced intravascular turbulence and wall shear stress, lowering the risk of inflammation and atherosclerosis [2, 3]. We have previously shown that high occupational physical activity confers an increased risk of cardiovascular and all-cause mortality among men with a low physical fitness, but not among men with high physical fitness [1]. However, the role of leisure time physical activity on the risk for cardiovascular disease and mortality from high occupational physical activity remains unsettled.

Relatively few studies have investigated the effects of occupational physical activity on cardiovascular disease and mortality among females [6]. Because type of occupational physical activity differs between male and female occupations [7] the effects of occupational physical activity on cardiovascular health may be different between the genders. A recent editorial on occupational physical activity and cardiovascular health highlights the need for future investigations in additional cohorts among both genders [8].

Accordingly, we hypothesized that high occupational physical activity is an independent risk factor for myocardial infarction and all-cause mortality in both men and women. Finally, we hypothesized that the level of leisure time physical activity in both genders modifies the association between occupational physical activity and risk of myocardial infarction and all-cause mortality.

## MATERIALS AND METHODS

### Study population

The Copenhagen City Heart Study is a prospective cardiovascular population study comprising a random sample of 19,698 males and females aged 20 to 101 years, drawn from the Copenhagen Population Register as of January 1, 1976. The first survey lasted from 1976 to 1978 (response rate 74%) and the second from 1981 to 1983 (response rate 70%). A total of 11,135 persons participated in both examinations.

Participants with previous myocardial infarction or stroke by self-report or according to the Danish National Patient Register established in 1977 were excluded (n= 644). Moreover, all persons above the age of retirement in Denmark at the time of the second examination (i.e. 67 years of age) were excluded, leaving 8,496 persons eligible. Finally, we excluded the 677 persons with missing values in occupational physical activity in one of the surveys, leaving 7,819 eligible for analyses.

Established cardiovascular risk factors were assessed at both examinations using a self-administered questionnaire and a physical examination. The Ethics Committee for the Copenhagen area approved the study (KF 100.2039/91).

### Occupational physical activity (the main predictor variable)

A single question with four categories was applied for measuring occupational physical activity: 'Which description most precisely covers your pattern of physical activity at work? [9]

1. You are mainly sedentary and do not walk much around at your workplace. *E.g.* desk work, work including assembling of minor parts. [Score 1]
2. You walk around quite a bit at your workplace but do not have to carry heavy items. *E.g.* light industrial work, non-sedentary office work, inspection and the like. [Score 2]

3. Most of the time you walk, and you often have to walk up stairs and lift various items. Examples include mail delivery and construction work. [Score 3]
4. You have heavy physical work. You carry heavy burdens and carry out physically strenuous work. *E.g.* work including digging and shoveling. [Score 4]

To reduce risk of misclassification, the main predictor variable was based on combined information from assessment in 1976-78 and 1981-83, summarizing and categorizing scores into: “low” = score 2-3, “moderate” = score 4-5, and “high” = score 6-8.

### **Leisure time physical activity (the potential effect modifier)**

A single question with four categories was applied for measuring leisure time physical activity:

‘Which description most precisely covers your pattern of physical activity during leisure time? [10]

1. Being almost entirely sedentary (e.g., reading, watching television or movies, engaging in light physical activity such as walking or biking for less than 2 hours per week). [Score 1]
2. Engaging in light physical activity for 2–4 hours per week. [Score 2]
3. Engaging in light physical activity for more than 4 hours per week or more vigorous activity for 2–4 hours per week (e.g., brisk walking, fast biking, heavy gardening, sports that cause perspiration or exhaustion). [Score 3]
4. Engaging in highly vigorous physical activity for more than 4 hours per week or regular heavy exercise or competitive sports several times per week. [Score 4]

Because of very few females (n=52) and males (n=140) in the highest category of leisure time physical activity, the variable was categorised into: score 1 = “low”, score 2 = “moderate”, and score 3-4 = “high”.

### **Potential confounders**

Potentially confounding factors for the association between occupational physical activity and cardiovascular health and mortality were measured as follows: smoking habits were categorized into never smokers, ex-smokers, and current smokers of <15, ≥15 g of tobacco per

1  
2  
3  
4 day. Current tobacco consumption was calculated by equating a cigarette to 1 g of tobacco, a cheroot to 3 g of tobacco, and a cigar to 5 g of  
5 tobacco. Systolic blood pressure was measured in a sitting position after 5 minutes of rest. Diabetes and treatment for hypertension were  
6 self-reported. Body mass index (BMI) was calculated as measured weight (kg) divided by height squared (m<sup>2</sup>). Alcohol consumption was  
7 categorized as abstention, monthly, weekly, or daily intake. Household income was self-reported, and stratified into low, medium and high.  
8 Cholesterol was measured non-fasting in mmol/L.  
9  
10  
11

### 12 13 14 **Follow-up**

15 Subjects were followed in national registers from the second examination (1981-83) until December 2008 for myocardial infarction and  
16 May 2010 for all-cause mortality. The end-point myocardial infarction was defined as the first incidence of fatal or non-fatal myocardial  
17 infarction according to the International Classification of Diseases: 8th revision code 410, and 10<sup>th</sup> revision codes I21–I22. Episodes of  
18 non-fatal myocardial infarction were retrieved from The National Hospital Discharge Register. Deaths were obtained from The Civil  
19 Registration System and causes of death from The National Register of Causes of Death. To reduce the maximum follow-up time without  
20 exposure to occupational physical activity to 10 years (the pension age is 67 years in Denmark), persons were censored from follow-up  
21 analyses at 77 years of age. Subjects were thus followed until outcome, age 77 or end of follow-up in 2010, whatever came first. The  
22 median duration of follow-up was 17.8 years (range 0 - 27.7) for myocardial infarction and 18.4 years (range 0 - 29.4) for all-cause  
23 mortality.  
24  
25  
26  
27  
28  
29  
30  
31

### 32 **Analyses**

33 For demographics, Pearson's chi-square test was used for categorical covariates and one-way ANOVA for continuous covariates.  
34  
35  
36

37 The associations between occupational physical activity and fatal and non-fatal myocardial infarction, and all-cause mortality were studied  
38 using sex-specific Cox proportional hazards regression models. Associations were investigated both overall and stratified according to level  
39 of leisure time physical activity. The Cox models were performed with age as underlying time scale and age at baseline as entry time. All  
40  
41  
42  
43  
44  
45



1  
2  
3  
4 adjusted models included the covariates smoking, alcohol consumption, BMI, leisure time physical activity, systolic blood pressure,  
5 diabetes, blood pressure medication and household income. We tested for interaction between gender, occupational physical activity, and the  
6 outcomes all-cause mortality and myocardial infarction. P-values below 0.05 were considered statistically significant. Statistical analyses  
7 were performed with R version 2.13.1.  
8  
9

10  
11  
12 Moreover, we tested for interaction between occupational physical activity, leisure time physical activity, and the outcomes all-cause  
13 mortality and myocardial infarction.  
14  
15

16  
17 Two additional analyses were performed. In the first analysis, the risk of all-cause mortality and myocardial infarction was investigated  
18 including exclusively males and females who had not changed their level of occupational physical activity from the first (1976-78) to the  
19 second examination (1981-83). Due to the low number of females in the highest category of occupational physical activity (n=2), the  
20 variable was categorized as: “low” = score 1, “moderate” = score 2, and “high” = scores 3 and 4 pooled. Because of the strong association  
21 between occupational physical activity and years of education, we found it necessary to carry out a second additional analysis including  
22 only those with a maximum school length of 10 years.  
23  
24  
25  
26  
27  
28  
29  
30  
31  
32  
33  
34  
35  
36  
37  
38  
39  
40  
41  
42  
43  
44  
45

## RESULTS

A total of 1,493 (41.4%) males and 1,395 (28.5%) females died; 511 (14.2%) males and 276 (5.6%) females experienced a first myocardial infarction episode during the follow-up period.

Table 1 shows lifestyle and other characteristics according to level of occupational physical activity among males and females. Several significant differences were found, but differences were generally small with no clear positive or negative trends. However, men with high occupational physical activity were more frequently smokers, had higher BMI, fewer with hypertension, and fewer with long (> 10 years) school education. Among females, women with high occupational physical activity had lower alcohol consumption, a lower leisure time physical activity level, lower systolic blood pressure, and fewer had a long school education.

Table 2 shows the distribution of participants in the four groups of occupational physical activity among males and females without a history of cardiovascular disease at the first examination (1976-78) and the second examination (1981-83) in the Copenhagen City Heart Study. Level of occupational physical activity remained constant between the two examinations in 61.0%, decreased in 22.6% and increased in 16.4%.

Table 3 shows the association between occupational physical activity and risk of all-cause mortality and myocardial infarction stratified by gender. The occupational physical activity variable consisted of the combined measure of occupational physical activity in 1976-78 and 1981-83. Among males, the risk of myocardial infarction increased with increasing occupational physical activity but only significantly among men with moderate exposure. For all-cause mortality, occupational physical activity increased the risk in a dose-response manner. Males with moderate occupational physical activity had an increased risk of 15% while those with high occupational physical activity had a 22% increase in all-cause mortality referencing males with low occupational physical activity. Among females, no tendency was found that increasing occupational physical activity increased the risk of either all-cause mortality or myocardial infarction.

1  
2  
3  
4 The association between occupational physical activity and both outcomes differed by gender even after control for potential confounders,  
5 test for interaction being significant ( $p=0.02$ ) for both all-cause mortality and myocardial infarction.  
6  
7

8  
9 In the additional analysis comprising only participants with unchanged level of occupational physical activity from the first (1976-78) to  
10 the second examination (1981-83), i.e. those shown in bold in Table 2 ( $n=4,766$ ), the risk estimates did not differ materially from the  
11 original model including all participants (data not shown).  
12  
13

14  
15 Table 4 shows the association between the combined measure of occupational physical activity and risk of all-cause mortality and  
16 myocardial infarction stratified by leisure time physical activity among males and females. Among men with low or moderate leisure time  
17 physical activity, risk of all-cause mortality was higher with increasing occupational physical activity. However, among men who were  
18 highly physically active during leisure time, the risk of all-cause mortality was independent of occupational physical activity level. Test for  
19 trend showed a significant interaction between occupational and leisure time physical activity ( $p=0.04$ ) even after control for potential  
20 confounders. Similar tendencies, although non-significant, were found for myocardial infarction among males. Among females,  
21 occupational physical activity did not increase either the risk of all-cause mortality or myocardial infarction in any of the leisure time  
22 physical activity groups and no significant interaction was found.  
23  
24  
25  
26  
27  
28  
29

30  
31 In the additional analysis including only those with a maximum school length of 10 years, the multi-adjusted analyses among males  
32 showed a significant increased risk of all-cause mortality from moderate ( $HR=1.17$ ;  $95\%CI=1.00-1.37$ ) and high ( $HR=1.21$ ;  $95\%CI=1.03-$   
33  $1.42$ ) occupational physical activity, but no significantly increased risk for myocardial infarction from moderate ( $HR=1.27$ ;  $95\%CI=0.98-$   
34  $1.65$ ) and high ( $HR=1.11$ ;  $95\%CI=0.85-1.46$ ) occupational physical activity. Among females with a maximum school length of 10 years,  
35 occupational physical activity was not significantly associated with all-cause mortality or myocardial infarction.  
36  
37  
38  
39  
40  
41  
42  
43  
44  
45

## COMMENTS

The primary finding of this study was the observation that leisure time physical activity modifies the positive association between occupational physical activity and risk of all-cause mortality. The second observation relating to the aim of the present study was the clear difference between males and females regarding occupational physical activity as a predictor of all-cause mortality and myocardial infarction. Overall, occupational physical activity did not predict risk among women. The third finding was that, overall, among men with a high occupational physical activity a statistically significant increased risk of all-cause mortality was seen, also when controlling for relevant confounders. Regarding myocardial infarction risk, the results were less clear but with similar tendencies.

The observations of the present study are in agreement with a number of previous studies addressing the association between high occupational physical activity and increased risk of all-cause mortality and cardiovascular disease [3, 6, 11-13]. The observation of a modifying effect of leisure time physical activity is in agreement with our previous observation that a high physical fitness seemed to completely counteract the positive association between occupational physical activity and risk of all-cause mortality and even ischaemic heart disease mortality [1].

Physical activity is regarded as beneficial for cardiovascular health but a distinction should be made between leisure time and occupational physical activity (Holtermann et al 2009). In contrast to leisure time physical activity, most occupational physical activity in modern industrialized societies does not include activities with high enough intensity to increase the maximal oxygen uptake capacity (physical fitness) (Holtermann et al 2010). Such activities encompass regular dynamic use of large muscle groups with high intensity and sufficient time for recovery [14, 15]. An explanation for the increased risk of mortality attributed to high occupational physical activity may include hemodynamic effects on the cardiovascular system promoting the development of atherosclerosis [2]. Several hours per day of high levels of occupational physical activity will inevitably cause prolonged elevated heart rate, eliciting a higher fraction of the cardiac cycle in the systolic phase with unfavorable intravascular turbulence and wall shear stress, leading to inflammatory processes in the arterial walls, which may result in atherosclerosis, cardiovascular disease and death [3].

1  
2  
3  
4  
5  
6  
7  
8  
9  
10  
11  
12  
13  
14  
15  
16  
17  
18  
19  
20  
21  
22  
23  
24  
25  
26  
27  
28  
29  
30  
31  
32  
33  
34  
35  
36  
37  
38  
39  
40  
41  
42  
43  
44  
45  
46  
47  
48  
49

As illustrated in table 2, most study participants did not change their level of occupational physical activity from the first examination (1976-78) to the second examination (1981-83). Among the 39% who did, changes were typically small and mostly to lower levels of occupational physical activity. Additional analyses on the association between occupational physical activity and all-cause mortality and myocardial infarction exclusively including participants who reported the same level of occupational physical activity at both examinations, showed results that were practically identical with the analyses based on the entire study population (data not shown). So, it seems unlikely that the observed positive association between occupational physical activity and all-cause mortality as well as myocardial infarction can be attributed to occupational physical activity changes due to health problems. Moreover, the significantly increased multi-adjusted risk of all-cause mortality from high occupational physical activity among males with a low educational level (<10 years) indicates that the observed association between occupational physical activity and all-cause mortality not is a result of socioeconomic confounding.

In contrast to the significant relationship among men, occupational physical activity was not a predictor of either all-cause mortality or myocardial infarction among women. The most likely reason for this difference is the fact that occupational physical activity qualitatively and quantitatively may reflect different physiological impacts from male and female works tasks, respectively. Lifting of heavy burdens, i.e. isometric work is a much more frequent work task in male occupations, and more dynamic work tasks more frequently characterize manual female work demands [7]. It is well known that heavy isometric work induces an acute rise in blood pressure with a subsequent induction of arterial wall shear stress. Due to the more dynamic occupational work tasks for females, this physiological effect may not be nearly as pronounced as for males.

#### *Strengths and limitations*

The main strengths of the present study include the long follow-up time, repeated assessment of the occupational physical activity, objective measures of several covariates from clinical examinations, and information on outcomes obtained from valid registers, and

1  
2  
3  
4 participation of both genders. Some limitations of the study should be addressed: 1) the lack of control for psychosocial work factors, and  
5 2) exposures are self-assessed. Ad 1) Previous studies have shown that control for psychosocial work factors have minimal influence on the  
6 association between occupational physical activity and cardiovascular disease and mortality [3, 6]. Ad 2) Another limitation of the present  
7 study is that the occupational physical activity and leisure time physical activity information was based on self-assessment, which may  
8 entail some degree of misclassification [16]. Such misclassification would however not explain the findings presented, rather the  
9 associations might have been attenuated.  
10  
11  
12  
13  
14

15  
16 In conclusion, occupational physical activity was a predictor of all-cause mortality as well as myocardial infarction in men, but not in  
17 women. Occupational physical activity was positively associated with risk of all-cause mortality in males with low and moderate leisure  
18 time physical activity, but not in males with high leisure time physical activity. The results suggest that high leisure time physical activity  
19 perhaps through increased physical fitness yields protection against harmful effects of high occupational physical activity. Gender  
20 differences in the relationship between occupational physical activity and risk of all-cause mortality and myocardial infarction may reflect  
21 qualitative as well as quantitative differences with respect to occupational physical exposures.  
22  
23  
24  
25  
26  
27  
28  
29  
30  
31  
32  
33  
34  
35  
36  
37  
38  
39  
40  
41  
42  
43  
44  
45  
46  
47  
48  
49

## TABLES

Table 1. Demographic and lifestyle factors of males and females between 20 and 67 years of age without a history of cardiovascular disorders stratified by level of occupational physical activity from the second examination (1981-83) in the Copenhagen City Heart Study, n=7,819. P-values of differences between the groups of occupational physical activity are provided.

| Gender:                               | Males            |                       |                   |         | Females          |                       |                 |         |
|---------------------------------------|------------------|-----------------------|-------------------|---------|------------------|-----------------------|-----------------|---------|
|                                       | Low<br>n = 1,114 | Moderate<br>n = 1,152 | High<br>n = 1,015 | p-value | Low<br>n = 1,506 | Moderate<br>n = 2,303 | High<br>n = 729 | p-value |
| Occupational physical activity        |                  |                       |                   |         |                  |                       |                 |         |
| Age, mean (SD)                        | 52.1 (10.2)      | 53.0 (9.4)            | 51.5 (8.6)        | <0.001  | 54.1 (9.1)       | 54.4 (9.0)            | 49.7 (9.1)      | <0.001  |
| BMI, mean (SD)                        | 25.6 (3.9)       | 26.0 (3.7)            | 26.6 (3.7)        | <0.001  | 24.5 (4.3)       | 24.9 (4.6)            | 24.8 (4.3)      | 0.04    |
| Current smokers, %                    | 62.9             | 65.7                  | 69.1              | <0.01   | 55.6             | 54.0                  | 59.8            | 0.02    |
| Consuming ≥1 unit alcohol a day, %    | 34.8             | 32.9                  | 41.5              | <0.001  | 13.4             | 10.8                  | 7.1             | <0.001  |
| Low leisure time physical activity, % | 14.9             | 11.8                  | 14.3              | <0.001  | 16.5             | 13.4                  | 11.0            | <0.001  |
| Systolic blood pressure, mean (SD)    | 140.4 (19.4)     | 140.9 (19.5)          | 139.1 (18.8)      | 0.08    | 135.2 (20.9)     | 136.8 (20.6)          | 131.1 (19.6)    | <0.001  |
| Blood pressure medication, %          | 8.7              | 7.6                   | 5.4               | 0.01    | 9.6              | 9.2                   | 7.1             | 0.15    |
| Diabetes, %                           | 4.0              | 3.7                   | 3.7               | 0.91    | 1.5              | 1.7                   | 1.0             | 0.36    |
| Low income, %                         | 9.3              | 12.2                  | 9.0               | <0.001  | 18.5             | 27.7                  | 17.2            | <0.001  |
| High school education (>10 years), %  | 37.3             | 17.1                  | 3.8               | <0.001  | 20.6             | 12.8                  | 10.8            | <0.001  |
| Cholesterol, mmol/L                   | 5.7 (1.1)        | 5.8 (1.1)             | 5.8 (1.1)         | 0.40    | 6.0 (1.2)        | 6.0 (1.2)             | 5.8 (1.2)       | <0.001  |

Table 2. Distribution of participants in the four levels of occupational physical activity among males and females between 20 and 67 years of age without a history of cardiovascular disorders at the first examination (1976-78) and the second examination (1981-83) in the Copenhagen City Heart Study, n=7,819. Numbers in bold are those males and females who did not change their level of occupational physical activity from the first (1976-78) to the second examination (1981-83).

| Gender                         | Males            |                       |                   |                        | Females          |                       |                   |                        |
|--------------------------------|------------------|-----------------------|-------------------|------------------------|------------------|-----------------------|-------------------|------------------------|
|                                | Low<br>(1981-83) | Moderate<br>(1981-83) | High<br>(1981-83) | Very high<br>(1981-83) | Low<br>(1981-83) | Moderate<br>(1981-83) | High<br>(1981-83) | Very high<br>(1981-83) |
| Occupational physical activity |                  |                       |                   |                        |                  |                       |                   |                        |
| Low (1976-78)                  | <b>698</b>       | 188                   | 51                | 7                      | <b>797</b>       | 347                   | 62                | 0                      |
| Moderate (1976-78)             | 228              | <b>536</b>            | 191               | 13                     | 362              | <b>1,304</b>          | 352               | 2                      |
| High (1976-78)                 | 108              | 201                   | <b>513</b>        | 64                     | 117              | 468                   | <b>704</b>        | 5                      |
| Very high (1976-78)            | 58               | 67                    | 146               | <b>212</b>             | 0                | 5                     | 11                | 2                      |



Table 3. Combined measure of occupational physical activity from 1976-78 and 1981-83 as predictor for fatal and non-fatal myocardial infarction and all-cause mortality among males and females between 20 and 67 years of age without a history of cardiovascular disorders in the Copenhagen City Heart Study (n=7,819).

|                                | No. of cases (%) | Hazard Ratio (95% CI) <sup>a</sup> | Hazard Ratio (95% CI) <sup>b</sup> |
|--------------------------------|------------------|------------------------------------|------------------------------------|
| <b>Males</b>                   |                  |                                    |                                    |
| <i>Myocardial infarction</i>   |                  |                                    |                                    |
| Occupational physical activity |                  |                                    |                                    |
| Low (n=1,114)                  | 133 (12%)        | 1 (reference)                      | 1 (reference)                      |
| Moderate (n=1,152)             | 183 (16%)        | 1.34 (1.07-1.68)**                 | 1.30 (1.03-1.64)*                  |
| High (n=1,015)                 | 145 (14%)        | 1.18 (0.93-1.50)                   | 1.20 (0.93-1.55)                   |
| <i>All-cause mortality</i>     |                  |                                    |                                    |
| Occupational physical activity |                  |                                    |                                    |
| Low (n=1,114)                  | 395 (35%)        | 1 (reference)                      | 1 (reference)                      |
| Moderate (n=1,152)             | 478 (41%)        | 1.17 (1.02-1.33)*                  | 1.15 (1.01-1.33)*                  |
| High (n=1,015)                 | 435 (43%)        | 1.21 (1.05-1.38)**                 | 1.22 (1.05-1.41)**                 |
| <b>Females</b>                 |                  |                                    |                                    |
| <i>Myocardial infarction</i>   |                  |                                    |                                    |
| Occupational physical activity |                  |                                    |                                    |
| Low (n=1,506)                  | 87 (6%)          | 1 (reference)                      | 1 (reference)                      |
| Moderate (n= 2,303)            | 113 (5%)         | 0.82 (0.62-1.09)                   | 0.76 (0.56-1.02)                   |
| High (n=729)                   | 45 (6%)          | 1.10 (0.76-1.57)                   | 0.98 (0.67-1.44)                   |
| <i>All-cause mortality</i>     |                  |                                    |                                    |
| Occupational physical activity |                  |                                    |                                    |
| Low (n=1,506)                  | 439 (29%)        | 1 (reference)                      | 1 (reference)                      |
| Moderate (n= 2,303)            | 619 (27%)        | 0.89 (0.79-1.01)                   | 0.88 (0.78-1.00)                   |
| High (n=729)                   | 194 (27%)        | 0.96 (0.81-1.14)                   | 0.95 (0.79-1.13)                   |

<sup>a</sup>: Control made for age

<sup>b</sup>: Control made for age, smoking, alcohol, BMI, leisure time physical activity, systolic blood pressure, diabetes, cholesterol, blood pressure medication and household income

\*:  $p \leq 0.05$ , \*\*:  $p \leq 0.01$

Table 4. Combined measure of occupational physical activity from 1976-78 and 1981-83 as predictor for fatal and non-fatal myocardial infarction and all-cause mortality among males and females between 20 and 67 years of age without a history of cardiovascular disorders stratified on leisure time physical activity in 1981-83 in the Copenhagen City Heart Study (n=7,819).

|                                                   | Occupational physical activity |           | No. of cases (%) | Hazard Ratio (95% CI) <sup>a</sup> | Hazard Ratio (95% CI) <sup>b</sup> |
|---------------------------------------------------|--------------------------------|-----------|------------------|------------------------------------|------------------------------------|
| <b>Males</b>                                      |                                |           |                  |                                    |                                    |
| <i>Myocardial infarction</i>                      |                                |           |                  |                                    |                                    |
| Low leisure time physical activity (n=447)        | Low                            | (n=166)   | 25 (15%)         | 1 (reference)                      | 1 (reference)                      |
|                                                   | Moderate                       | (n=136)   | 25 (18%)         | 1.28 (0.74-2.23)                   | 1.39 (0.76-2.53)                   |
|                                                   | High                           | (n=145)   | 23 (16%)         | 1.15 (0.65-2.03)                   | 1.15 (0.62-2.13)                   |
| Moderate leisure time physical activity (n=1,468) | Low                            | (n=531)   | 59 (11%)         | 1 (reference)                      | 1 (reference)                      |
|                                                   | Moderate                       | (n=532)   | 82 (15%)         | 1.39 (1.00-1.95)                   | 1.27 (0.89-1.80)                   |
|                                                   | High                           | (n=405)   | 63 (16%)         | 1.43 (1.00-2.04)*                  | 1.41 (0.96-2.06)                   |
| High leisure time physical activity (n=1,364)     | Low                            | (n=417)   | 49 (12%)         | 1 (reference)                      | 1 (reference)                      |
|                                                   | Moderate                       | (n=483)   | 75 (16%)         | 1.31 (0.92-1.88)                   | 1.27 (0.87-1.86)                   |
|                                                   | High                           | (n=464)   | 59 (13%)         | 1.00 (0.69-1.47)                   | 1.04 (0.69-1.55)                   |
| <i>All-cause mortality</i>                        |                                |           |                  |                                    |                                    |
| Low leisure time physical activity (n=447)        | Low                            | (n=166)   | 74 (45%)         | 1 (reference)                      | 1 (reference)                      |
|                                                   | Moderate                       | (n=136)   | 73 (54%)         | 1.27 (0.92-1.75)                   | 1.15 (0.81-1.62)                   |
|                                                   | High                           | (n=145)   | 85 (59%)         | 1.48 (1.08-2.02)*                  | 1.56 (1.11-2.18)*                  |
| Moderate leisure time physical activity (n=1,468) | Low                            | (n=531)   | 185 (35%)        | 1 (reference)                      | 1 (reference)                      |
|                                                   | Moderate                       | (n=532)   | 230 (43%)        | 1.24 (1.02-1.50)*                  | 1.28 (1.05-1.57)*                  |
|                                                   | High                           | (n=405)   | 179 (44%)        | 1.29 (1.05-1.59)*                  | 1.31 (1.05-1.63)*                  |
| High leisure time physical activity (n=1,364)     | Low                            | (n=417)   | 136 (33%)        | 1 (reference)                      | 1 (reference)                      |
|                                                   | Moderate                       | (n=483)   | 174 (36%)        | 1.08 (0.86-1.35)                   | 0.96 (0.76-1.22)                   |
|                                                   | High                           | (n=464)   | 171 (37%)        | 1.06 (0.85-1.33)                   | 1.00 (0.78-1.26)                   |
| <b>Females</b>                                    |                                |           |                  |                                    |                                    |
| <i>Myocardial infarction</i>                      |                                |           |                  |                                    |                                    |
| Low leisure time physical activity (n=637)        | Low                            | (n=248)   | 17 (7%)          | 1 (reference)                      | 1 (reference)                      |
|                                                   | Moderate                       | (n=309)   | 18 (6%)          | 0.82 (0.42-1.59)                   | 1.03 (0.49-2.15)                   |
|                                                   | High                           | (n=80)    | 7 (9%)           | 1.13 (0.47-2.73)                   | 1.55 (0.55-4.35)                   |
| Moderate leisure time physical activity (n=2,568) | Low                            | (n=899)   | 58 (6%)          | 1 (reference)                      | 1 (reference)                      |
|                                                   | Moderate                       | (n=1,317) | 63 (5%)          | 0.72 (0.50-1.03)                   | 0.65 (0.45-0.95)*                  |
|                                                   | High                           | (n=352)   | 22 (6%)          | 1.01 (0.62-1.65)                   | 0.78 (0.46-1.33)                   |
| High leisure time physical activity (n=1,332)     | Low                            | (n=358)   | 12 (3%)          | 1 (reference)                      | 1 (reference)                      |
|                                                   | Moderate                       | (n=677)   | 32 (5%)          | 1.38 (0.71-2.68)                   | 1.00 (0.49-2.01)                   |
|                                                   | High                           | (n=297)   | 16 (5%)          | 1.75 (0.82-3.70)                   | 1.18 (0.54-2.60)                   |
| <i>All-cause mortality</i>                        |                                |           |                  |                                    |                                    |
| Low leisure time physical activity (n=637)        | Low                            | (n=248)   | 94 (38%)         | 1 (reference)                      | 1 (reference)                      |
|                                                   | Moderate                       | (n=309)   | 106 (34%)        | 0.87 (0.66-1.14)                   | 0.89 (0.66-1.20)                   |
|                                                   | High                           | (n=80)    | 30 (38%)         | 0.91 (0.60-1.37)                   | 0.99 (0.63-1.54)                   |

|                                                   |          |           |           |                   |                   |
|---------------------------------------------------|----------|-----------|-----------|-------------------|-------------------|
| Moderate leisure time physical activity (n=2,568) | Low      | (n=899)   | 259 (29%) | 1 (reference)     | 1 (reference)     |
|                                                   | Moderate | (n=1,317) | 325 (25%) | 0.83 (0.70-0.98)* | 0.80 (0.68-0.95)* |
|                                                   | High     | (n=352)   | 90 (26%)  | 0.93 (0.73-1.18)  | 0.92 (0.71-1.18)  |
| High leisure time physical activity (n=1,332)     | Low      | (n=358)   | 86 (24%)  | 1 (reference)     | 1 (reference)     |
|                                                   | Moderate | (n=677)   | 188 (28%) | 1.12 (0.87-1.45)  | 1.06 (0.81-1.39)  |
|                                                   | High     | (n=297)   | 74 (25%)  | 1.18 (0.86-1.61)  | 1.05 (0.76-1.45)  |

<sup>a</sup>: Control made for age

<sup>b</sup>: Control made for age, smoking, alcohol, BMI, leisure time physical activity, systolic blood pressure, diabetes, cholesterol, blood pressure medication and household income

\*:  $p \leq 0.05$ , \*\*:  $p \leq 0.01$

1  
2  
3  
4 **ACKNOWLEDGEMENT** The Danish Working Environment Research Foundation

5 **COMPETING INTEREST STATEMENT** “Andreas Holtermann as the Corresponding Author  
6 does grant on behalf of all authors, an exclusive licence on a worldwide basis to the BMJ Publishing  
7 Group Ltd, and its Licensees to permit this article (if accepted) to be published in Occupational  
8 Environmental Medicine and any other BMJ PGL products and to exploit all subsidiary rights, as set  
9 out in our licence.”

10  
11  
12  
13 **CONFLICTS OF INTEREST** None

14 **COMPETING INTEREST STATEMENT** None. All authors declare that the answer to the  
15 questions on your competing interest form Exclusive licence  
16 (<http://bmj.com/cgi/content/full/317/7154/291/DC1>) are all No and therefore have nothing to  
17 declare.  
18

19 **COPYRIGHT** “The Corresponding Author has the right to grant on behalf of all authors and does  
20 grant on behalf of all authors, an exclusive licence (or non exclusive for government employees) on  
21 a worldwide basis to the BMJ Publishing Group Ltd and its licensees , to permit this article (if  
22 accepted) to be published in BMJ editions and any other BMJPG products and to exploit all  
23 subsidiary rights, as set out in our licence ([http://resources.bmj.com/bmj/authors/checklists-  
24 forms/licence-for-publication](http://resources.bmj.com/bmj/authors/checklists-forms/licence-for-publication))”  
25  
26  
27  
28  
29  
30  
31

32 **FUNDING** The study is a part of the Physical work demands and fitness project, financed by the  
33 Danish Working Environment Research Foundation. The sponsor had no influence on the study  
34 design, data collection, analysis, interpretation of data, writing the article and decision to submit it  
35 for publication. We declare that all authors are independent of the funders.  
36  
37  
38

39 **DATA SHARING STATEMENT** Technical appendix and statistical code available from the  
40 corresponding author at aho@nrcwe.dk. Consent was not obtained, but the presented data are  
41 anonymised and risk of identification is very low. No additional data available.  
42  
43

44 **ORIGINALE STUDY PROTOCOL** It does not exist  
45

#### 46 **CONTRIBUTORS AND NAME OF GUARANTOR**

47  
48 All authors contributed to the conception, design, interpretation of data, and writing or critically  
49 revising the manuscript. Jacob Louis Marott made the statistical analyses. Andreas Holtermann and  
50 Jacob Louis Marott are guarantors  
51

#### 52 **ETHICAL APPROVAL**

53 The Ethics Committee for the Copenhagen area Denmark approved the study (KF 100.2039/91).  
54  
55  
56  
57  
58  
59  
60

## REFERENCES

- 1 Holtermann A, Mortensen OS, Burr H, *et al.* Physical demands at work, physical fitness, and 30-year ischaemic heart disease and all-cause mortality in The Copenhagen Male Study. *Scandinavian Journal of Work & Environmental Health* 2010;**36**:357-65.
- 2 Glagov S, Zarins C, Giddens DP, *et al.* Hemodynamics and atherosclerosis - Insights and perspectives gained from studies of human arteries. *Archives of Pathology & Laboratory Medicine* 1988;**112**:1018-31.
- 3 Krause N, Brand RJ, Kaplan GA, *et al.* Occupational physical activity, energy expenditure and 11-year progression of carotid atherosclerosis. *Scandinavian Journal of Work and Environmental Health* 2007;**33**:405-24.
- 4 Blair SN, Kampert JB, Kohl HW, *et al.* Influences of cardiorespiratory fitness and other precursors on cardiovascular disease and all-cause mortality in men and women. *Journal of the American Medical Association* 1996;**276**:205-10.
- 5 Eicher JD, Maresh CM, Tsongalis GJ, *et al.* The additive blood pressure lowering effects of exercise intensity on post-exercise hypotension. *American Heart Journal* 2010;**160**:513-20.
- 6 Holtermann A, Burr H, Hansen JV, *et al.* Occupational physical activity and mortality among Danish workers. *Int Arch Occup Environ Health* 2011;**Epub ahead of print.**
- 7 Aittomaki A, Lahelma E, Roos E, *et al.* Gender differences in the association of age with physical workload and functioning. *Occup Environ Med* 2005;**62**:95-100.

- 1  
2  
3  
4 8 Krause N. Physical activity and cardiovascular mortality - disentangling the roles of work,  
5 fitness, and leisure. *Scandinavian Journal of Work & Environmental Health* 2010;**36**:349-55.  
6  
7  
8  
9  
10 9 Saltin B, Grimby G. Physiological analysis of middle-aged and old former athletes: comparison  
11 with still active athletes of the same ages. *Circulation* 1968;**38**:1104-15.  
12  
13  
14  
15  
16  
17 10 Schnohr P. Physical activity in leisure time: impact on mortality. Risks and benefits. Thesis.  
18  
19 *Danish Medical Bulletin* 2009;**56**:40-71.  
20  
21  
22  
23 11 Kristal-Boneh E, Harari G, Melamed S, *et al.* Association of physical activity at work with  
24 mortality in Israeli industrial employees: The CORDIS study. *Journal of Occupational and*  
25  
26 *Environmental Medicine* 2000;**42**:127-35.  
27  
28  
29  
30  
31  
32 12 Stender M, Hense HW, Doring A, *et al.* Physical-activity at work and cardiovascular-disease  
33 risk - results from the Monica Augsborg Study. *Int J Epidemiol* 1993;**22**:644-50.  
34  
35  
36  
37  
38 13 Holtermann A, Mortensen OS, Burr H, *et al.* The interplay between physical activity at work  
39 and during leisure time - risk of ischemic heart disease and all-cause mortality in middle-aged  
40  
41  
42  
43  
44  
45  
46  
47 14 Ilmarinen J. Work and cardiovascular health: viewpoint of occupational physiology. *Annual*  
48  
49 *Medicine* 1989;**21**:209-14.  
50  
51  
52  
53 15 Ruzic L, Heimer S, Misigoj-Durakovic M, *et al.* Increased occupational physical activity does  
54  
55 not improve physical fitness. *Occup Environ Med* 2003;**60**:983-5.  
56  
57  
58  
59  
60

1  
2  
3  
4 16 Sallis JF, Saelens BE. Assessment of physical activity by self-report: Status, limitations, and  
5  
6 future directions. *Research Quarterly for Exercise and Sport* 2000;**71**:S1-S14.  
7  
8  
9  
10  
11  
12  
13  
14  
15  
16  
17  
18  
19  
20  
21  
22  
23  
24  
25  
26  
27  
28  
29  
30  
31  
32  
33  
34  
35  
36  
37  
38  
39  
40  
41  
42  
43  
44  
45  
46  
47  
48  
49  
50  
51  
52  
53  
54  
55  
56  
57  
58  
59  
60

For peer review only

STROBE Statement—Checklist of items that should be included in reports of *cohort studies*

|                           | Item No | Recommendation              |
|---------------------------|---------|-----------------------------|
| <b>Title and abstract</b> | 1       | Page 1                      |
|                           |         | Page 2                      |
| <b>Introduction</b>       |         |                             |
| Background/rationale      | 2       | Page 4                      |
| Objectives                | 3       | Page 4                      |
| <b>Methods</b>            |         |                             |
| Study design              | 4       | Page 5, 7 and 8             |
| Setting                   | 5       | Page 5                      |
| Participants              | 6       | Page 5                      |
| Variables                 | 7       | Page 5, and 6               |
| Data sources/ measurement | 8       | Page 5, 6 and 7             |
| Bias                      | 9       | Page 7 and 8                |
| Study size                | 10      | Page 5                      |
| Quantitative variables    | 11      | Page 5, 6 and 7             |
| Statistical methods       | 12      | Page 7 and 8                |
|                           |         | Page 7 and 8                |
| <b>Results</b>            |         |                             |
| Participants              | 13      | Page 9                      |
|                           |         | Page 9                      |
| Descriptive data          | 14      | Page 9                      |
|                           |         | Page 9                      |
|                           |         | Page 9                      |
| Outcome data              | 15      | Page 9, 10 and table 3, 4   |
| Main results              | 16      | Table 3-4                   |
|                           |         | Page 9 and 10               |
|                           |         | Table 3-4                   |
| Other analyses            | 17      | No other analyses were done |
| <b>Discussion</b>         |         |                             |
| Key results               | 18      | Page 11                     |
| Limitations               | 19      | Page 12 and 13              |
| Interpretation            | 20      | Page 11, 12 and 13          |
| Generalisability          | 21      | Page 12 and 13              |
| <b>Other information</b>  |         |                             |
| Funding                   | 22      | Page 19                     |



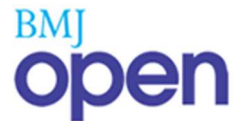

**Occupational and leisure time physical activity: risk of all-cause mortality and myocardial infarction in the Copenhagen City Heart Study. A prospective cohort study**

|                                 |                                                                                                                                                                                                                                                                   |
|---------------------------------|-------------------------------------------------------------------------------------------------------------------------------------------------------------------------------------------------------------------------------------------------------------------|
| Journal:                        | <i>BMJ Open</i>                                                                                                                                                                                                                                                   |
| Manuscript ID:                  | bmjopen-2011-000556.R1                                                                                                                                                                                                                                            |
| Article Type:                   | Research                                                                                                                                                                                                                                                          |
| Date Submitted by the Author:   | 13-Jan-2012                                                                                                                                                                                                                                                       |
| Complete List of Authors:       | Holtermann, Andreas<br>Marott, Jacob<br>Gyntelberg, Finn<br>Søgaard, Karen<br>Suadicani, Poul<br>Mortensen, Ole; Bispebjerg University Hospital, Department of Occupational Health<br>prescott, eva; Bispebjerg University Hospital, Cardiology<br>Schnohr, Peter |
| <b>Primary Subject Heading</b>: | Occupational & environmental medicine                                                                                                                                                                                                                             |
| Secondary Subject Heading:      | Epidemiology, Public health, Cardiovascular medicine                                                                                                                                                                                                              |
| Keywords:                       | OCCUPATIONAL & INDUSTRIAL MEDICINE, Myocardial infarction < CARDIOLOGY, PUBLIC HEALTH                                                                                                                                                                             |
|                                 |                                                                                                                                                                                                                                                                   |

SCHOLARONE™  
Manuscripts

only

1  
2  
3  
4 **Occupational and leisure time physical activity: risk of all-cause mortality and**  
5 **myocardial infarction in the Copenhagen City Heart Study. A prospective**  
6 **cohort study**  
7  
8  
9

10 Andreas Holtermann<sup>1</sup>, Jacob Louis Marott<sup>2</sup>, Finn Gyntelberg<sup>3</sup>, Karen Søgaard<sup>4</sup>, Poul  
11 Suadicani<sup>3</sup>, Ole Steen Mortensen<sup>1,3</sup>, Eva Prescott<sup>2,5</sup>, Peter Schnohr<sup>2</sup>  
12  
13

14  
15 <sup>1</sup>National Research Centre for the Working Environment, Lersø Park Allé 105, DK-2100,  
16 Copenhagen, Denmark  
17

18  
19 <sup>2</sup>The Copenhagen City Heart Study, Bispebjerg University Hospital, Bispebjerg Bakke 23, DK-2400  
20 Copenhagen, Denmark  
21

22  
23 <sup>3</sup>The Copenhagen Male Study, Epidemiological Research Unit, Dept. of Occupational and  
24 Environmental Medicine, Bispebjerg University Hospital, DK-2400 Copenhagen NV, Denmark  
25

26  
27 <sup>4</sup>Institute of Sport Science and Clinical Biomechanics, University of Southern Denmark, Campusvej  
28 55, DK-5230 Odense M, Denmark  
29

30  
31 <sup>5</sup>Department of Cardiology, Bispebjerg University Hospital, Bispebjerg Bakke 23, DK-2400  
32 Copenhagen, Denmark  
33

34  
35  
36 Corresponding Author

37 Andreas Holtermann,

38 National Research Centre for the Working Environment,

39 Copenhagen, Denmark

40 E-mail: [aho@nrcwe.dk](mailto:aho@nrcwe.dk)

41 Telephone number: 0045 39165200  
42  
43  
44  
45  
46  
47

48 Keywords: Cardiovascular disease; occupational health; physical work demands; physical exercise  
49

50 Word count: 3000  
51  
52  
53  
54  
55  
56  
57  
58  
59  
60

**ABSTRACT**

**Objectives** Men with low physical fitness and high occupational physical activity are recently shown to have an increased risk of cardiovascular disease and all-cause mortality. The association between occupational physical activity with cardiovascular disease and all-cause mortality may also depend on leisure time physical activity.

**Design** A prospective cohort study.

**Setting** The Copenhagen City Heart Study.

**Participants** 7,819 males and females aged 25-66 years without history of cardiovascular disease who attended an initial examination in the Copenhagen City Heart Study in 1976-78.

**Outcome measures** Myocardial infarction and all-cause mortality.

Occupational physical activity was defined by combining information from baseline (1976-78) with re-assessment in (1981-83). Conventional risk factors were controlled for in Cox analyses.

**Results** During the follow-up from 1976-78 until 2010, 2,888 subjects died from all-cause mortality and 787 had a first event of myocardial infarction. Overall, occupational physical activity predicted all-cause mortality and myocardial infarction in men, but not in women (test for interaction  $p=0.02$ ). Among males, high occupational physical activity was associated with an increased risk of all-cause mortality among those with low and moderate leisure time physical activity (Hazard ratio (HR) =1.56; 95% confidence interval (95%CI) 1.11-2.18) and (HR=1.31; 95%CI 1.05-1.63), but not among males with high leisure time physical activity (HR=1.00; 95%CI 0.78-1.26) (test for interaction  $p=0.04$ ). Similar, but weaker tendencies were found for myocardial infarction. Among women, occupational physical activity was not associated with subsequent all-cause mortality or MI.

**Conclusions** The findings suggest that high occupational physical activity imposes harmful effects particularly among men with low levels of leisure time physical activity.

## ARTICLE SUMMARY

### Article focus

- Men with low physical fitness and high occupational physical activity are recently shown to have an increased risk of cardiovascular disease and all-cause mortality.
- It is unknown if the association between occupational physical activity with cardiovascular disease and all-cause mortality also depends on leisure time physical activity.

### Key messages

- This study shows that men with high occupational physical activity have an increased risk of all-cause mortality.
- Leisure time physical activity was found to modify the positive association between occupational physical activity and risk of all-cause mortality. High occupational physical activity imposes harmful effects particularly among men with low levels of leisure time physical activity.

### Strengths and limitations

Study strengths include the long follow-up time, repeated assessment of the occupational physical activity, objective measures of several covariates from clinical examinations, and information on outcomes obtained from valid registers, and participation of both sexes. Some limitations are the lack of control for psychosocial work factors and the self-reported exposures.

## INTRODUCTION

A positive association has been demonstrated between occupational physical activity and risk of cardiovascular and all-cause mortality among men with low cardiorespiratory capacity, i.e. physical fitness [1]. A physiological explanation may be prolonged intravascular turbulence and increased wall shear stress from occupational physical activity several hours per day [2], inducing inflammatory processes in the arterial walls eventually leading to atherosclerosis [3].

Theoretically, these acute adverse effects of occupational physical activity may be modified by leisure time physical activity known to promote cardio-respiratory fitness [4] and reduce heart rate and blood pressure during daily activities [5]. A higher cardio-respiratory fitness and lower heart rate provides a longer period in the diastolic phase of the cardiac cycle, causing better myocardium perfusion and reduced intravascular turbulence and wall shear stress, lowering the risk of inflammation and atherosclerosis [2, 3]. Therefore, the increased cardio-respiratory fitness and reduced heart rate and blood pressure from leisure time physical activity may counteract the prolonged intravascular turbulence and increased wall shear stress from occupational physical activity. We have previously shown that high occupational physical activity confers an increased risk of cardiovascular and all-cause mortality among men with a low physical fitness, but not among men with high physical fitness [1]. However, the role of leisure time physical activity on the risk for cardiovascular disease and mortality from high occupational physical activity remains unsettled.

Relatively few studies have investigated the effects of occupational physical activity on cardiovascular disease and mortality among females [6]. Because type of occupational physical activity differs between male and female occupations [7] the effects of occupational physical activity on cardiovascular health may depend on sex. A recent editorial on occupational physical activity and cardiovascular health highlights the need for future investigations in additional cohorts among both sexes [8].

Accordingly, we hypothesized that high occupational physical activity is an independent risk factor for myocardial infarction and all-cause mortality in both men and women. Finally, we hypothesized that the level of leisure time physical activity in both sexes modifies the association between occupational physical activity and risk of myocardial infarction and all-cause mortality.

## MATERIALS AND METHODS

### Study population

The Copenhagen City Heart Study is a prospective cardiovascular population study comprising a random sample of 19,698 males and females aged 20 to 101 years, drawn from the Copenhagen Population Register as of January 1, 1976. The first survey lasted from 1976 to 1978 (response rate 74%) and the second from 1981 to 1983 (response rate 70%). A total of 11,135 persons participated in both examinations.

Participants with previous myocardial infarction or stroke by self-report or according to the Danish National Patient Register established in 1977 were excluded (n= 644). Moreover, all persons above the age of retirement in Denmark at the time of the second examination (i.e. 67 years of age) were excluded, leaving 8,496 persons eligible. Finally, we excluded the 677 persons with missing values in occupational physical activity in one of the surveys, leaving 7,819 eligible for analyses.

Established cardiovascular risk factors were assessed at both examinations using a self-administered questionnaire and a physical examination. The Ethics Committee for the Copenhagen area approved the study (KF 100.2039/91).

### Occupational physical activity (the main predictor variable)

A single question with four categories was applied for measuring occupational physical activity:

‘Which description most precisely covers your pattern of physical activity at work? [9]

1. You are mainly sedentary and do not walk much around at your workplace. *E.g.* desk work, work including assembling of minor parts. [Score 1]
2. You walk around quite a bit at your workplace but do not have to carry heavy items. *E.g.* light industrial work, non-sedentary office work, inspection and the like. [Score 2]
3. Most of the time you walk, and you often have to walk up stairs and lift various items. Examples include mail delivery and construction work. [Score 3]
4. You have heavy physical work. You carry heavy burdens and carry out physically strenuous work. *E.g.* work including digging and shoveling. [Score 4]

To reduce risk of misclassification, the main predictor variable was based on combined information from assessment in 1976-78 and 1981-83, summarizing the total sum of scores. Then, the scores were categorized into: “low” = score 2-3, “moderate” = score 4-5, and “high” = score 6-8.

### Leisure time physical activity (the potential effect modifier)

A single question with four categories was applied for measuring leisure time physical activity:

‘Which description most precisely covers your pattern of physical activity during leisure time? [10]

1. Being almost entirely sedentary (e.g., reading, watching television or movies, engaging in light physical activity such as walking or biking for less than 2 hours per week). [Score 1]
2. Engaging in light physical activity for 2–4 hours per week. [Score 2]
3. Engaging in light physical activity for more than 4 hours per week or more vigorous activity for 2–4 hours per week (e.g., brisk walking, fast biking, heavy gardening, sports that cause perspiration or exhaustion). [Score 3]
4. Engaging in highly vigorous physical activity for more than 4 hours per week or regular heavy exercise or competitive sports several times per week. [Score 4]’

Because of very few females (n=52) and males (n=140) in the highest category of leisure time physical activity, the variable was categorised into: score 1 = “low”, score 2 = “moderate”, and score 3-4 = “high”.

### Potential confounders

Potentially confounding factors for the association between occupational physical activity and cardiovascular health and mortality were measured as follows: smoking habits were categorized into never smokers, ex-smokers, and current smokers of <15, ≥15 g of tobacco per day. Current tobacco consumption was calculated by equating a cigarette to 1 g of tobacco, a cheroot to 3 g of tobacco, and a cigar to 5 g of tobacco. Systolic blood pressure was measured in a sitting position after 5 minutes of rest. Diabetes and use of anti-hypertensive medication were self-reported. Those reporting to use anti-hypertensive medication were defined as hypertensive. Body mass index (BMI) was calculated as measured weight (kg) divided by height squared (m<sup>2</sup>). Alcohol consumption was categorized as abstention, monthly, weekly, or daily intake of at least 1 unit of alcohol. Household income was self-reported based on average income per month within the last year, and stratified into low, medium and high. Cholesterol was measured non-fasting in mmol/L. Details of the potential confounders are previously published [11].

### Follow-up

1  
2  
3  
4 Subjects were followed in national registers from the second examination (1981-83) until December  
5 2008 for myocardial infarction and May 2010 for all-cause mortality. The end-point myocardial  
6 infarction was defined as the first incidence of fatal or non-fatal myocardial infarction according to  
7 the International Classification of Diseases: 8th revision code 410, and 10<sup>th</sup> revision codes I21–I22.  
8 Episodes of non-fatal myocardial infarction were retrieved from The National Hospital Discharge  
9 Register. Deaths were obtained from The Civil Registration System and causes of death from The  
10 National Register of Causes of Death. To reduce the maximum follow-up time without exposure to  
11 occupational physical activity to 10 years (the pension age is 67 years in Denmark), persons were  
12 censored from follow-up analyses at 77 years of age. Subjects were thus followed until outcome,  
13 age 77 or end of follow-up in 2010, whatever came first. The median duration of follow-up was  
14 17.8 years (range 0 - 27.7) for myocardial infarction and 18.4 years (range 0 - 29.4) for all-cause  
15 mortality.  
16  
17  
18  
19  
20  
21  
22  
23

## 24 25 26 **Analyses**

27 For demographics, Pearson's chi-square test was used for categorical covariates and one-way  
28 ANOVA for continuous covariates.  
29  
30  
31

32 The associations between occupational physical activity and fatal and non-fatal myocardial  
33 infarction, and all-cause mortality were studied using sex-specific Cox proportional hazards  
34 regression models. Associations were investigated both overall and stratified according to level of  
35 leisure time physical activity. The Cox models were performed with age as underlying time scale  
36 and age at baseline as entry time. All adjusted models included the covariates smoking, alcohol  
37 consumption, BMI, leisure time physical activity, systolic blood pressure, diabetes, blood pressure  
38 medication, cholesterol and household income. We tested for interaction between sex, occupational  
39 physical activity, and the outcomes all-cause mortality and myocardial infarction. Deviation from  
40 the proportional hazards assumption was evaluated by Schoenfeld residuals, and by inspection of  
41 log-log plots. P-values below 0.05 were considered statistically significant. Statistical analyses were  
42 performed with R version 2.13.1.  
43  
44  
45  
46  
47  
48  
49  
50

51  
52 Moreover, we tested for interaction between occupational physical activity, leisure time physical  
53 activity, and the outcomes all-cause mortality and myocardial infarction.  
54  
55  
56  
57  
58  
59  
60



Two additional analyses were performed. In the first analysis, the risk of all-cause mortality and myocardial infarction was investigated including exclusively males and females who had not changed their level of occupational physical activity from the first (1976-78) to the second examination (1981-83). Due to the low number of females in the highest category of occupational physical activity (n=2), the variable was categorized as: “low” = score 1, “moderate” = score 2, and “high” = scores 3 and 4 pooled. Because of the strong association between occupational physical activity and years of education, we found it necessary to carry out a second additional analysis including only those with a maximum school length of 10 years.

## RESULTS

A total of 1,493 (41.4%) males and 1,395 (28.5%) females died; 511 (14.2%) males and 276 (5.6%) females experienced a first myocardial infarction episode during the follow-up period.

Table 1 shows lifestyle and other characteristics according to level of occupational physical activity among males and females. Several significant differences were found, but differences were generally small with no clear positive or negative trends. However, men with high occupational physical activity were more frequently smokers, had higher BMI, fewer with hypertension, and fewer with long (>10 years) school education. Among females, women with high occupational physical activity had lower alcohol consumption, a lower leisure time physical activity level, lower systolic blood pressure, and fewer had a long school education.

Table 2 shows the distribution of participants in the four groups of occupational physical activity among males and females without a history of cardiovascular disease at the first examination (1976-78) and the second examination (1981-83) in the Copenhagen City Heart Study. Level of occupational physical activity remained constant between the two examinations for 61.0%, decreased for 22.6% and increased for 16.4% of the participants.

Table 3 shows the association between occupational physical activity and risk of all-cause mortality and myocardial infarction stratified by sex. The occupational physical activity variable consisted of the combined measure of occupational physical activity in 1976-78 and 1981-83. Among males, the risk of myocardial infarction increased with higher occupational physical activity but only significantly among men with moderate exposure. For all-cause mortality, occupational physical

1  
2  
3  
4 activity increased the risk in a dose-response manner (test for trend,  $p=0.008$ ). Males with moderate  
5 occupational physical activity had an increased risk of 15% while those with high occupational  
6 physical activity had a 22% increase in all-cause mortality referencing males with low occupational  
7 physical activity. Among females, no tendency was found that increasing occupational physical  
8 activity increased the risk of either all-cause mortality or myocardial infarction.  
9  
10  
11

12  
13  
14 The association between occupational physical activity and both outcomes differed by sex even  
15 after control for potential confounders, test for interaction being significant ( $p=0.02$ ) for both all-  
16 cause mortality and myocardial infarction.  
17  
18  
19

20  
21 In the additional analysis comprising only participants with unchanged level of occupational  
22 physical activity from the first (1976-78) to the second examination (1981-83), i.e. those shown in  
23 bold in Table 2 ( $n=4,766$ ), the risk estimates did not differ materially from the original model  
24 including all participants (data not shown).  
25  
26  
27

28  
29 Table 4 shows the association between the combined measure of occupational physical activity and  
30 risk of all-cause mortality and myocardial infarction stratified by leisure time physical activity  
31 among males and females. Among men with low or moderate leisure time physical activity, risk of  
32 all-cause mortality was increased with higher occupational physical activity (test for trend,  $p=0.01$   
33 in both cases). However, among men who were highly physically active during leisure time, the risk  
34 of all-cause mortality was independent of occupational physical activity level. A significant  
35 interaction between occupational and leisure time physical activity was found ( $p=0.04$ ) even after  
36 control for potential confounders. Similar tendencies, although non-significant, were found for  
37 myocardial infarction among males. Among females, occupational physical activity did not increase  
38 either the risk of all-cause mortality or myocardial infarction in any of the leisure time physical  
39 activity groups and no significant interaction was found.  
40  
41  
42  
43  
44  
45  
46  
47  
48

49 In the additional analysis including only those with a maximum school length of 10 years, the  
50 multi-adjusted analyses among males showed a significant increased risk of all-cause mortality  
51 from moderate ( $HR=1.17$ ;  $95\%CI=1.00-1.37$ ) and high ( $HR=1.21$ ;  $95\%CI=1.03-1.42$ ) occupational  
52 physical activity, but no significantly increased risk for myocardial infarction from moderate  
53 ( $HR=1.27$ ;  $95\%CI=0.98-1.65$ ) and high ( $HR=1.11$ ;  $95\%CI=0.85-1.46$ ) occupational physical  
54  
55  
56  
57  
58  
59  
60

1  
2  
3  
4 activity. Among females with a maximum school length of 10 years, occupational physical activity  
5 was not significantly associated with all-cause mortality or myocardial infarction.  
6  
7  
8

## 9 **COMMENTS**

10 The primary finding of this study was the observation that leisure time physical activity modifies  
11 the positive association between occupational physical activity and risk of all-cause mortality. The  
12 second observation relating to the aim of the present study was the clear difference between males  
13 and females regarding occupational physical activity as a predictor of all-cause mortality and  
14 myocardial infarction. Overall, occupational physical activity did not predict risk among women.  
15 The third finding was that, overall, among men with a high occupational physical activity a  
16 statistically significant increased risk of all-cause mortality was seen, also when controlling for  
17 relevant confounders. Regarding myocardial infarction risk, the results were less clear but with  
18 similar tendencies.  
19  
20  
21  
22  
23  
24  
25  
26

27 The observations of the present study are in agreement with a number of previous studies  
28 addressing the association between high occupational physical activity and increased risk of all-  
29 cause mortality and cardiovascular disease [3, 6, 12-14]. The observation of a modifying effect of  
30 leisure time physical activity is in agreement with our previous observation that a high physical  
31 fitness seemed to completely counteract the positive association between occupational physical  
32 activity and risk of all-cause mortality and even ischaemic heart disease mortality [1].  
33  
34  
35  
36  
37  
38

39 Physical activity is regarded as beneficial for cardiovascular health but a distinction should be made  
40 between leisure time and occupational physical activity [14]. In contrast to leisure time physical  
41 activity, most occupational physical activity in modern industrialized societies does not include  
42 activities with high enough intensity to increase the maximal oxygen uptake capacity (physical  
43 fitness) [1]. Such activities encompass regular dynamic use of large muscle groups with high  
44 intensity and sufficient time for recovery [15, 16]. An explanation for the increased risk of mortality  
45 attributed to high occupational physical activity may include hemodynamic effects on the  
46 cardiovascular system promoting the development of atherosclerosis [2]. Several hours per day of  
47 high levels of occupational physical activity will inevitably cause prolonged elevated heart rate,  
48 eliciting a higher fraction of the cardiac cycle in the systolic phase with unfavorable intravascular  
49 turbulence and wall shear stress, leading to inflammatory processes in the arterial walls, which may  
50  
51  
52  
53  
54  
55  
56  
57  
58  
59  
60

1  
2  
3  
4 result in atherosclerosis, cardiovascular disease and death [3]. Because of the distinctive effect of  
5 leisure time and occupational physical activity, non-specified (total) measurements of physical  
6 activity are likely to provide attenuated cardiovascular risk estimates. Therefore, measurements of  
7 physical activity ought to be domain specific.  
8  
9

10  
11  
12 As illustrated in table 2, most study participants did not change their level of occupational physical  
13 activity from the first examination (1976-78) to the second examination (1981-83). Among the 39%  
14 who did, changes were typically small and mostly to lower levels of occupational physical activity.  
15 Additional analyses on the association between occupational physical activity and all-cause  
16 mortality and myocardial infarction exclusively including participants who reported the same level  
17 of occupational physical activity at both examinations, showed results that were practically identical  
18 with the analyses based on the entire study population (data not shown). So, it seems unlikely that  
19 the observed positive association between occupational physical activity and all-cause mortality as  
20 well as myocardial infarction can be attributed to occupational physical activity changes due to  
21 health problems. Moreover, the significantly increased multi-adjusted risk of all-cause mortality  
22 from high occupational physical activity among males with a low educational level (<10 years)  
23 indicates that the observed association between occupational physical activity and all-cause  
24 mortality not is a result of socioeconomic confounding.  
25  
26  
27  
28  
29  
30  
31  
32  
33  
34

35  
36 In contrast to the significant relationship among men, occupational physical activity was not a  
37 predictor of either all-cause mortality or myocardial infarction among women. The most likely  
38 reason for this difference is the fact that occupational physical activity qualitatively and  
39 quantitatively may reflect different physiological impacts from male and female works tasks,  
40 respectively. Lifting of heavy burdens, i.e. isometric work is a much more frequent work task in  
41 male occupations, and more dynamic work tasks more frequently characterize manual female work  
42 demands [7]. It is well known that heavy isometric work induces an acute rise in blood pressure  
43 with a subsequent induction of arterial wall shear stress. Due to the more dynamic occupational  
44 work tasks for females, this physiological effect may not be nearly as pronounced as for males.  
45  
46  
47  
48  
49  
50

#### 51 52 *Strengths and limitations*

53  
54 The main strengths of the present study include the prospective design, the large size of a random  
55 sample of both men and women representative of the population of Copenhagen, long follow-up  
56  
57  
58  
59  
60

1  
2  
3  
4 time, almost 100% follow-up on national registers, repeated assessment of the occupational physical  
5 activity, objective measures of several covariates from clinical examinations, and information on  
6 outcomes obtained from valid registers, and participation of both sex. Some limitations of the study  
7 should be addressed: 1) the lack of control for psychosocial work factors, 2) exposures are self-  
8 reported, 3) the leisure time physical activity was only measured at baseline. Ad 1) Previous studies  
9 have shown that control for psychosocial work factors have minimal influence on the association  
10 between occupational physical activity and cardiovascular disease and mortality [3, 6]. It is  
11 unknown if a potential bias due to lack of control for psychosocial work factors would increase or  
12 attenuate the risk estimates. Ad 2) Another limitation of the present study is that the occupational  
13 physical activity and leisure time physical activity information was based on self-assessment, which  
14 may entail some degree of misclassification [17]. Such misclassification would however not explain  
15 the findings presented, as the potential bias would rather attenuate the risk estimates.

16  
17 Moreover, the rather crude measure of alcohol consumption may have caused some  
18 misclassification of alcohol consumption. Because of the very few participants responding in the  
19 highest category of leisure time physical activity, the highest category was merged with the second  
20 highest category of leisure time physical activity. However, merging of the responses to these  
21 categories could only have a minor impact on the risk estimates from the second highest category  
22 alone. Although the occupational physical activity was measured at different ages in this study  
23 population with a large age range (25-66 years), the rather similar mean age in the groups with  
24 different levels of occupational physical activity (table 1) makes it unlikely that this would  
25 influence the results of the study.

26  
27  
28  
29  
30  
31  
32  
33  
34  
35  
36  
37  
38  
39  
40  
41  
42  
43  
44  
45  
46  
47  
48  
49  
50  
51  
52  
53  
54  
55  
56  
57  
58  
59  
60  
In conclusion, occupational physical activity was a predictor of all-cause mortality as well as  
myocardial infarction in men, but not in women. Occupational physical activity was positively  
associated with risk of all-cause mortality in males with low and moderate leisure time physical  
activity, but not in males with high leisure time physical activity. The results suggest that high  
occupational physical activity imposes harmful effects particular among men with lower levels of  
leisure time physical activity. Sex differences in the relationship between occupational physical  
activity and risk of all-cause mortality and myocardial infarction may reflect qualitative as well as  
quantitative differences with respect to occupational physical exposures.

## TABLES

Table 1. Demographic and lifestyle factors of males and females between 20 and 67 years of age without a history of cardiovascular disorders stratified by level of occupational physical activity from the second examination (1981-83) in the Copenhagen City Heart Study, n=7,819. P-values of differences between the groups of occupational physical activity are provided.

| Sex:                                     | Males                          |                  |                       |                   | Females      |                  |                       |                 |
|------------------------------------------|--------------------------------|------------------|-----------------------|-------------------|--------------|------------------|-----------------------|-----------------|
|                                          | Occupational physical activity | Low<br>n = 1,114 | Moderate<br>n = 1,152 | High<br>n = 1,015 | p-<br>value  | Low<br>n = 1,506 | Moderate<br>n = 2,303 | High<br>n = 729 |
| Age, mean (SD)                           | 52.1 (10.2)                    | 53.0 (9.4)       | 51.5 (8.6)            | <0.001            | 54.1 (9.1)   | 54.4 (9.0)       | 49.7 (9.1)            | <0.001          |
| BMI, mean (SD)                           | 25.6 (3.9)                     | 26.0 (3.7)       | 26.6 (3.7)            | <0.001            | 24.5 (4.3)   | 24.9 (4.6)       | 24.8 (4.3)            | 0.04            |
| Current smokers, %                       | 62.9                           | 65.7             | 69.1                  | <0.01             | 55.6         | 54.0             | 59.8                  | 0.02            |
| Consuming $\geq 1$ unit alcohol a day, % | 34.8                           | 32.9             | 41.5                  | <0.001            | 13.4         | 10.8             | 7.1                   | <0.001          |
| Low leisure time physical activity, %    | 14.9                           | 11.8             | 14.3                  | <0.001            | 16.5         | 13.4             | 11.0                  | <0.001          |
| Systolic blood pressure, mean (SD)       | 140.4 (19.4)                   | 140.9 (19.5)     | 139.1 (18.8)          | 0.08              | 135.2 (20.9) | 136.8 (20.6)     | 131.1 (19.6)          | <0.001          |
| Blood pressure medication, %             | 8.7                            | 7.6              | 5.4                   | 0.01              | 9.6          | 9.2              | 7.1                   | 0.15            |
| Diabetes, %                              | 4.0                            | 3.7              | 3.7                   | 0.91              | 1.5          | 1.7              | 1.0                   | 0.36            |
| Low income, %                            | 9.3                            | 12.2             | 9.0                   | <0.001            | 18.5         | 27.7             | 17.2                  | <0.001          |
| High school education (>10 years), %     | 37.3                           | 17.1             | 3.8                   | <0.001            | 20.6         | 12.8             | 10.8                  | <0.001          |
| Cholesterol, mmol/L                      | 5.7 (1.1)                      | 5.8 (1.1)        | 5.8 (1.1)             | 0.40              | 6.0 (1.2)    | 6.0 (1.2)        | 5.8 (1.2)             | <0.001          |

Table 2. Distribution of participants in the four levels of occupational physical activity among males and females between 20 and 67 years of age without a history of cardiovascular disorders at the first examination (1976-78) and the second examination (1981-83) in the Copenhagen City Heart Study, n=7,819. Numbers in bold are those males and females who did not change their level of occupational physical activity from the first (1976-78) to the second examination (1981-83).

| Sex                 | physical | Males                |                           |                       |                           | Females              |                           |                       |                           |
|---------------------|----------|----------------------|---------------------------|-----------------------|---------------------------|----------------------|---------------------------|-----------------------|---------------------------|
|                     |          | Low<br>(1981-<br>83) | Moderate<br>(1981-<br>83) | High<br>(1981-<br>83) | Very<br>high<br>(1981-83) | Low<br>(1981-<br>83) | Moderate<br>(1981-<br>83) | High<br>(1981-<br>83) | Very<br>high<br>(1981-83) |
| Occupational        |          |                      |                           |                       |                           |                      |                           |                       |                           |
| activity            |          |                      |                           |                       |                           |                      |                           |                       |                           |
| Low (1976-78)       |          | <b>698</b>           | 188                       | 51                    | 7                         | <b>797</b>           | 347                       | 62                    | 0                         |
| Moderate (1976-78)  |          | 228                  | <b>536</b>                | 191                   | 13                        | 362                  | <b>1,304</b>              | 352                   | 2                         |
| High (1976-78)      |          | 108                  | 201                       | <b>513</b>            | 64                        | 117                  | 468                       | <b>704</b>            | 5                         |
| Very high (1976-78) |          | 58                   | 67                        | 146                   | <b>212</b>                | 0                    | 5                         | 11                    | <b>2</b>                  |



Table 3. Combined measure of occupational physical activity from 1976-78 and 1981-83 as predictor for fatal and non-fatal myocardial infarction and all-cause mortality among males and females between 20 and 67 years of age without a history of cardiovascular disorders in the Copenhagen City Heart Study (n=7,819).

|                                |           | Person-<br>years | No. of<br>cases (%) | Hazard Ratio<br>(95% CI) <sup>a</sup> | Hazard Ratio<br>(95% CI) <sup>b</sup> |
|--------------------------------|-----------|------------------|---------------------|---------------------------------------|---------------------------------------|
| <b>Males</b>                   |           |                  |                     |                                       |                                       |
| <i>Myocardial infarction</i>   |           |                  |                     |                                       |                                       |
| Occupational physical activity |           |                  |                     |                                       |                                       |
| Low                            | (n=1,114) | 19,941           | 133 (12%)           | 1 (reference)                         | 1 (reference)                         |
| Moderate                       | (n=1,152) | 19,828           | 183 (16%)           | 1.34 (1.07-1.68)**                    | 1.30 (1.03-1.64)*                     |
| High                           | (n=1,015) | 18,424           | 145 (14%)           | 1.18 (0.93-1.50)                      | 1.20 (0.93-1.55)                      |
| <i>All-cause mortality</i>     |           |                  |                     |                                       |                                       |
| Occupational physical activity |           |                  |                     |                                       |                                       |
| Low                            | (n=1,114) | 21,108           | 395 (35%)           | 1 (reference)                         | 1 (reference)                         |
| Moderate                       | (n=1,152) | 21,136           | 478 (41%)           | 1.17 (1.02-1.33)*                     | 1.15 (1.01-1.33)*                     |
| High                           | (n=1,015) | 19,596           | 435 (43%)           | 1.21 (1.05-1.38)**                    | 1.22 (1.05-1.41)**                    |
| <b>Females</b>                 |           |                  |                     |                                       |                                       |
| <i>Myocardial infarction</i>   |           |                  |                     |                                       |                                       |
| Occupational physical activity |           |                  |                     |                                       |                                       |
| Low                            | (n=1,506) | 27,403           | 87 (6%)             | 1 (reference)                         | 1 (reference)                         |
| Moderate                       | (n=2,303) | 41,944           | 113 (5%)            | 0.82 (0.62-1.09)                      | 0.76 (0.56-1.02)                      |
| High                           | (n=729)   | 15,257           | 45 (6%)             | 1.10 (0.76-1.57)                      | 0.98 (0.67-1.44)                      |
| <i>All-cause mortality</i>     |           |                  |                     |                                       |                                       |
| Occupational physical activity |           |                  |                     |                                       |                                       |
| Low                            | (n=1,506) | 28,326           | 439 (29%)           | 1 (reference)                         | 1 (reference)                         |
| Moderate                       | (n=2,303) | 43,330           | 619 (27%)           | 0.89 (0.79-1.01)                      | 0.88 (0.78-1.00)                      |
| High                           | (n=729)   | 15,901           | 194 (27%)           | 0.96 (0.81-1.14)                      | 0.95 (0.79-1.13)                      |

<sup>a</sup>: Control made for age

<sup>b</sup>: Control made for age, smoking, alcohol, BMI, leisure time physical activity, systolic blood pressure, diabetes, cholesterol, blood pressure medication, and household income

\*:  $p \leq 0.05$ , \*\*:  $p \leq 0.01$



Table 4. Combined measure of occupational physical activity from 1976-78 and 1981-83 as predictor for fatal and non-fatal myocardial infarction and all-cause mortality among males and females between 20 and 67 years of age without a history of cardiovascular disorders stratified on leisure time physical activity in 1981-83 in the Copenhagen City Heart Study (n=7,816).

|                                                   | <b>Occupational physical activity</b> | <b>Person-years</b> | <b>No. of cases (%)</b> | <b>Hazard Ratio (95% CI)<sup>a</sup></b> | <b>Hazard Ratio (95% CI)<sup>b</sup></b> |
|---------------------------------------------------|---------------------------------------|---------------------|-------------------------|------------------------------------------|------------------------------------------|
| <b>Males</b>                                      |                                       |                     |                         |                                          |                                          |
| <i>Myocardial infarction</i>                      |                                       |                     |                         |                                          |                                          |
| Low leisure time physical activity (n=447)        | Low (n=166)                           | 2,825               | 25 (15%)                | 1 (reference)                            | 1 (reference)                            |
|                                                   | Moderate (n=136)                      | 2,248               | 25 (18%)                | 1.28 (0.74-2.23)                         | 1.39 (0.76-2.53)                         |
|                                                   | High (n=145)                          | 2,382               | 23 (16%)                | 1.15 (0.65-2.03)                         | 1.15 (0.62-2.13)                         |
| Moderate leisure time physical activity (n=1,468) | Low (n=531)                           | 9,544               | 59 (11%)                | 1 (reference)                            | 1 (reference)                            |
|                                                   | Moderate (n=532)                      | 9,131               | 82 (15%)                | 1.39 (1.00-1.95)                         | 1.27 (0.89-1.80)                         |
|                                                   | High (n=405)                          | 7,254               | 63 (16%)                | 1.43 (1.00-2.04)*                        | 1.41 (0.96-2.06)                         |
| High leisure time physical activity (n=1,364)     | Low (n=417)                           | 7,572               | 49 (12%)                | 1 (reference)                            | 1 (reference)                            |
|                                                   | Moderate (n=483)                      | 8,442               | 75 (16%)                | 1.31 (0.92-1.88)                         | 1.27 (0.87-1.86)                         |
|                                                   | High (n=464)                          | 8,761               | 59 (13%)                | 1.00 (0.69-1.47)                         | 1.04 (0.69-1.55)                         |
| <i>All-cause mortality</i>                        |                                       |                     |                         |                                          |                                          |
| Low leisure time physical activity (n=447)        | Low (n=166)                           | 3,012               | 74 (45%)                | 1 (reference)                            | 1 (reference)                            |
|                                                   | Moderate (n=136)                      | 2,422               | 73 (54%)                | 1.27 (0.92-1.75)                         | 1.15 (0.81-1.62)                         |
|                                                   | High (n=145)                          | 2,549               | 85 (59%)                | 1.48 (1.08-2.02)*                        | 1.56 (1.11-2.18)*                        |
| Moderate leisure time physical activity (n=1,468) | Low (n=531)                           | 10,049              | 185 (35%)               | 1 (reference)                            | 1 (reference)                            |
|                                                   | Moderate (n=532)                      | 9,702               | 230 (43%)               | 1.24 (1.02-1.50)*                        | 1.28 (1.05-1.57)*                        |
|                                                   | High (n=405)                          | 7,794               | 179 (44%)               | 1.29 (1.05-1.59)*                        | 1.31 (1.05-1.63)*                        |
| High leisure time physical activity (n=1,364)     | Low (n=417)                           | 8,048               | 136 (33%)               | 1 (reference)                            | 1 (reference)                            |
|                                                   | Moderate (n=483)                      | 8,997               | 174 (36%)               | 1.08 (0.86-1.35)                         | 0.96 (0.76-1.22)                         |
|                                                   | High (n=464)                          | 9,226               | 171 (37%)               | 1.06 (0.85-1.33)                         | 1.00 (0.78-1.26)                         |
| <b>Females</b>                                    |                                       |                     |                         |                                          |                                          |
| <i>Myocardial infarction</i>                      |                                       |                     |                         |                                          |                                          |
| Low leisure time physical activity (n=637)        | Low (n=248)                           | 4,085               | 17 (7%)                 | 1 (reference)                            | 1 (reference)                            |
|                                                   | Moderate (n=309)                      | 5,335               | 18 (6%)                 | 0.82 (0.42-1.59)                         | 1.03 (0.49-2.15)                         |
|                                                   | High (n=80)                           | 1,564               | 7 (9%)                  | 1.13 (0.47-2.73)                         | 1.55 (0.55-4.35)                         |
| Moderate leisure time physical activity (n=2,568) | Low (n=899)                           | 16,632              | 58 (6%)                 | 1 (reference)                            | 1 (reference)                            |
|                                                   | Moderate (n=1,317)                    | 24,387              | 63 (5%)                 | 0.72 (0.50-1.03)                         | 0.65 (0.45-0.95)*                        |
|                                                   | High (n=352)                          | 7,427               | 22 (6%)                 | 1.01 (0.62-1.65)                         | 0.78 (0.46-1.33)                         |
| High leisure time physical activity (n=1,332)     | Low (n=358)                           | 6,671               | 12 (3%)                 | 1 (reference)                            | 1 (reference)                            |
|                                                   | Moderate (n=677)                      | 12,222              | 32 (5%)                 | 1.38 (0.71-2.68)                         | 1.00 (0.49-2.01)                         |
|                                                   | High (n=297)                          | 6,266               | 16 (5%)                 | 1.75 (0.82-3.70)                         | 1.18 (0.54-2.60)                         |
| <i>All-cause mortality</i>                        |                                       |                     |                         |                                          |                                          |
| Low leisure time physical activity (n=637)        | Low (n=248)                           | 4,247               | 94 (38%)                | 1 (reference)                            | 1 (reference)                            |
|                                                   | Moderate (n=309)                      | 5,503               | 106 (34%)               | 0.87 (0.66-1.14)                         | 0.89 (0.66-1.20)                         |
|                                                   | High (n=80)                           | 1,612               | 30 (38%)                | 0.91 (0.60-1.37)                         | 0.99 (0.63-1.54)                         |
| Moderate leisure time physical activity (n=2,568) | Low (n=899)                           | 17,210              | 259 (29%)               | 1 (reference)                            | 1 (reference)                            |
|                                                   | Moderate (n=1,317)                    | 25,221              | 325 (25%)               | 0.83 (0.70-0.98)*                        | 0.80 (0.68-0.95)*                        |
|                                                   | High (n=352)                          | 7,726               | 90 (26%)                | 0.93 (0.73-1.18)                         | 0.92 (0.71-1.18)                         |
| High leisure time physical activity (n=1,332)     | Low (n=358)                           | 6,853               | 86 (24%)                | 1 (reference)                            | 1 (reference)                            |
|                                                   | Moderate (n=677)                      | 12,607              | 188 (28%)               | 1.12 (0.87-1.45)                         | 1.06 (0.81-1.39)                         |
|                                                   | High (n=297)                          | 6,563               | 74 (25%)                | 1.18 (0.86-1.61)                         | 1.05 (0.76-1.45)                         |

<sup>a</sup>: Control made for age

<sup>b</sup>: Control made for age, smoking, alcohol, BMI, systolic blood pressure, diabetes, cholesterol, blood pressure medication, and household income

\*:  $p \leq 0.05$ , \*\*:  $p \leq 0.01$

1  
2  
3  
4 **ACKNOWLEDGEMENT** The Danish Working Environment Research Foundation

5 **COMPETING INTEREST STATEMENT** “Andreas Holtermann as the Corresponding Author  
6 does grant on behalf of all authors, an exclusive licence on a worldwide basis to the BMJ Publishing  
7 Group Ltd, and its Licensees to permit this article (if accepted) to be published in Occupational  
8 Environmental Medicine and any other BMJPG products and to exploit all subsidiary rights, as set  
9 out in our licence.”

10  
11  
12  
13 **CONFLICTS OF INTEREST** None

14 **COMPETING INTEREST STATEMENT** None. All authors declare that the answer to the  
15 questions on your competing interest form Exclusive licence  
16 (<http://bmj.com/cgi/content/full/317/7154/291/DC1>) are all No and therefore have nothing to  
17 declare.  
18

19 **COPYRIGHT** “The Corresponding Author has the right to grant on behalf of all authors and does  
20 grant on behalf of all authors, an exclusive licence (or non exclusive for government employees) on  
21 a worldwide basis to the BMJ Publishing Group Ltd and its licensees , to permit this article (if  
22 accepted) to be published in BMJ editions and any other BMJPG products and to exploit all  
23 subsidiary rights, as set out in our licence ([http://resources.bmj.com/bmj/authors/checklists-  
24 forms/licence-for-publication](http://resources.bmj.com/bmj/authors/checklists-forms/licence-for-publication))”  
25  
26  
27  
28  
29  
30  
31

32 **FUNDING** The study is a part of the Physical work demands and fitness project, financed by the  
33 Danish Working Environment Research Foundation. The sponsor had no influence on the study  
34 design, data collection, analysis, interpretation of data, writing the article and decision to submit it  
35 for publication. We declare that all authors are independent of the funders.  
36  
37  
38

39 **DATA SHARING STATEMENT** Technical appendix and statistical code available from the  
40 corresponding author at [aho@nrcwe.dk](mailto:aho@nrcwe.dk). Consent was not obtained, but the presented data are  
41 anonymised and risk of identification is very low. No additional data available.  
42  
43

44 **ORIGINALE STUDY PROTOCOL** It does not exist  
45

#### 46 **CONTRIBUTORS AND NAME OF GUARANTOR**

47  
48 All authors contributed to the conception, design, interpretation of data, and writing or critically  
49 revising the manuscript. Jacob Louis Marott made the statistical analyses. Andreas Holtermann and  
50 Jacob Louis Marott are guarantors. All authors approved the final version of the manuscript.  
51

#### 52 **ETHICAL APPROVAL**

53  
54 The Ethics Committee for the Copenhagen area Denmark approved the study (KF 100.2039/91).  
55  
56  
57  
58  
59  
60

## References

- 1 Holtermann A, Mortensen OS, Burr H, *et al.* Physical demands at work, physical fitness, and 30-year ischaemic heart disease and all-cause mortality in The Copenhagen Male Study. *Scandinavian Journal of Work & Environmental Health* 2010;**36**:357-65.
- 2 Glagov S, Zarins C, Giddens DP, *et al.* Hemodynamics and atherosclerosis - Insights and perspectives gained from studies of human arteries. *Archives of Pathology & Laboratory Medicine* 1988;**112**:1018-31.
- 3 Krause N, Brand RJ, Kaplan GA, *et al.* Occupational physical activity, energy expenditure and 11-year progression of carotid atherosclerosis. *Scandinavian Journal of Work and Environmental Health* 2007;**33**:405-24.
- 4 Blair SN, Kampert JB, Kohl HW, *et al.* Influences of cardiorespiratory fitness and other precursors on cardiovascular disease and all-cause mortality in men and women. *Journal of the American Medical Association* 1996;**276**:205-10.
- 5 Eicher JD, Maresh CM, Tsongalis GJ, *et al.* The additive blood pressure lowering effects of exercise intensity on post-exercise hypotension. *American Heart Journal* 2010;**160**:513-20.
- 6 Holtermann A, Burr H, Hansen JV, *et al.* Occupational physical activity and mortality among Danish workers. *Int Arch Occup Environ Health* 2011;**Epub ahead of print**.
- 7 Aittomaki A, Lahelma E, Roos E, *et al.* Gender differences in the association of age with physical workload and functioning. *Occup Environ Med* 2005;**62**:95-100.

- 1  
2  
3  
4 8 Krause N. Physical activity and cardiovascular mortality - disentangling the roles of work,  
5 fitness, and leisure. *Scandinavian Journal of Work & Environmental Health* 2010;**36**:349-55.  
6  
7  
8  
9  
10 9 Saltin B, Grimby G. Physiological analysis of middle-aged and old former athletes:  
11 comparison with still active athletes of the same ages. *Circulation* 1968;**38**:1104-15.  
12  
13  
14  
15  
16  
17 10 Schnohr P. Physical activity in leisure time: impact on mortality. Risks and benefits. Thesis.  
18 *Danish Medical Bulletin* 2009;**56**:40-71.  
19  
20  
21  
22  
23 11 Appleyard M. The Copenhagen City Heart Study, Østerbroundersøgelsen. A book of tables  
24 with data from the first examination (1976-78) and a five year follow-up (1981-83).  
25 *Scandinavian Journal of Social Medicine* 1984.  
26  
27  
28  
29  
30  
31  
32 12 Kristal-Boneh E, Harari G, Melamed S, *et al.* Association of physical activity at work with  
33 mortality in Israeli industrial employees: The CORDIS study. *Journal of Occupational and*  
34 *Environmental Medicine* 2000;**42**:127-35.  
35  
36  
37  
38  
39  
40 13 Stender M, Hense HW, Doring A, *et al.* Physical-activity at work and cardiovascular-disease  
41 risk - results from the Monica Augsburg Study. *Int J Epidemiol* 1993;**22**:644-50.  
42  
43  
44  
45  
46  
47 14 Holtermann A, Mortensen OS, Burr H, *et al.* The interplay between physical activity at work  
48 and during leisure time - risk of ischemic heart disease and all-cause mortality in middle-aged  
49 Caucasian men. *Scandinavian Journal of Work & Environmental Health* 2009;**35**:466-74.  
50  
51  
52  
53  
54  
55  
56  
57  
58  
59  
60

- 1  
2  
3  
4 15 Ilmarinen J. Work and cardiovascular health: viewpoint of occupational physiology. *Annual*  
5  
6 *Medicine* 1989;**21**:209-14.  
7  
8  
9  
10 16 Ruzic L, Heimer S, Misigoj-Durakovic M, *et al*. Increased occupational physical activity does  
11  
12 not improve physical fitness. *Occup Environ Med* 2003;**60**:983-5.  
13  
14  
15  
16  
17 17 Sallis JF, Saelens BE. Assessment of physical activity by self-report: Status, limitations, and  
18  
19 future directions. *Research Quarterly For Exercise And Sport* 2000;**71**:S1-S14.  
20  
21  
22  
23  
24  
25  
26  
27  
28  
29  
30  
31  
32  
33  
34  
35  
36  
37  
38  
39  
40  
41  
42  
43  
44  
45  
46  
47  
48  
49  
50  
51  
52  
53  
54  
55  
56  
57  
58  
59  
60

STROBE Statement—Checklist of items that should be included in reports of *cohort studies*

|                           | Item No | Recommendation              |
|---------------------------|---------|-----------------------------|
| <b>Title and abstract</b> | 1       | Page 1                      |
|                           |         | Page 2                      |
| <b>Introduction</b>       |         |                             |
| Background/rationale      | 2       | Page 4                      |
| Objectives                | 3       | Page 4                      |
| <b>Methods</b>            |         |                             |
| Study design              | 4       | Page 5, 7 and 8             |
| Setting                   | 5       | Page 5                      |
| Participants              | 6       | Page 5                      |
| Variables                 | 7       | Page 5, and 6               |
| Data sources/ measurement | 8       | Page 5, 6 and 7             |
| Bias                      | 9       | Page 7 and 8                |
| Study size                | 10      | Page 5                      |
| Quantitative variables    | 11      | Page 5, 6 and 7             |
| Statistical methods       | 12      | Page 7 and 8                |
|                           |         | Page 7 and 8                |
| <b>Results</b>            |         |                             |
| Participants              | 13      | Page 9                      |
|                           |         | Page 9                      |
| Descriptive data          | 14      | Page 9                      |
|                           |         | Page 9                      |
|                           |         | Page 9                      |
| Outcome data              | 15      | Page 9, 10 and table 3, 4   |
| Main results              | 16      | Table 3-4                   |
|                           |         | Page 9 and 10               |
|                           |         | Table 3-4                   |
| Other analyses            | 17      | No other analyses were done |
| <b>Discussion</b>         |         |                             |
| Key results               | 18      | Page 11                     |
| Limitations               | 19      | Page 12 and 13              |
| Interpretation            | 20      | Page 11, 12 and 13          |
| Generalisability          | 21      | Page 12 and 13              |
| <b>Other information</b>  |         |                             |
| Funding                   | 22      | Page 19                     |
